# Supplementary material for: Evaluating Land Surface Temperature Trends and Explanatory Variables in the Miami Metropolitan Area from 2002–2021
Source: MDPI journal article supplement (doi:10.3390/geomatics4010001), 2023-12-25
Supplement: s1 [file s1]

**Table S1.** LST distribution statistics.

|               | Minimum (°C) | Maximum (°C) | Mean (°C) | Standard Deviation (°C) |
|---------------|--------------|--------------|-----------|-------------------------|
| MSA Dry Day   | 20.47        | 33.32        | 26.91     | 2.70                    |
| MSA Dry Night | 14.56        | 22.37        | 17.90     | 1.26                    |
| MSA Wet Day   | 25.17        | 36.64        | 30.34     | 2.51                    |
| MSA Wet Night | 19.33        | 25.35        | 22.17     | 1.05                    |
| PBC Dry Day   | 20.47        | 31.44        | 26.49     | 2.82                    |
| PBC Dry Night | 14.56        | 20.31        | 17.04     | 1.57                    |
| PBC Wet Day   | 25.17        | 35.60        | 29.52     | 2.13                    |
| PBC Wet Night | 19.33        | 24.44        | 21.38     | 1.48                    |
| BC Dry Day    | 22.87        | 32.44        | 26.37     | 2.35                    |
| BC Dry Night  | 14.81        | 20.34        | 17.64     | 1.33                    |
| BC Wet Day    | 26.93        | 36.29        | 30.07     | 2.46                    |
| BC Wet Night  | 19.51        | 25.19        | 22.19     | 0.98                    |
| MDC Dry Day   | 22.58        | 33.32        | 27.86     | 2.94                    |
| MDC Dry Night | 16.79        | 22.37        | 19.02     | 0.88                    |
| MDC Wet Day   | 26.49        | 36.64        | 31.43     | 2.93                    |
| MDC Wet Night | 21.29        | 25.35        | 22.95     | 0.69                    |
